# Supplementary material
Source: MDPI journal article supplement (https://www.mdpi.com/2071-1050/14/16/9860)
Supplement: s1 [file s1 › sustainability-1821971-supplementary.pdf]

# Preparation of Special Wettability Quartz Sand Filter Media and Its Synchronous Oil/Water Mixture Separation and Dye Adsorption

Che Yinglong <sup>1</sup>, Guo Hanyue <sup>1,2</sup>, Man Shide <sup>1</sup>, Zhang Tingting <sup>1,3,\*</sup> and Wei Bigui <sup>1,2,\*</sup>

<sup>1</sup> School of Environmental and Municipal Engineering, Lanzhou 730070, China; cheyinglong197@163.com (C.Y.); szrzyghj@163.com (G.H.); manshide186@163.com (M.S.)

<sup>2</sup> Jiangxi Architectural Design and Research Institute Group Co., Ltd, Nanchang 330046, China

<sup>3</sup> Key laboratory of Yellow River Water Environment in Gansu Province, Lanzhou 730070, China

\* Correspondence: zhangting1229ztt@163.com (Z.T.); weibg@mail.lzjtu.cn (W.B.)

## Supporting information

**Figure S1.** Diagram for intrusion pressure device. **Figure S2.** SEM images of (a-c) unmodified quartz sand; (d-f) CCQS. **Figure S3.** XPS spectra of Filter material. **Figure S4.** Separation device for oil and water mixture. **Figure S5.** The permeability coefficients of the water outlet and oil outlet when filtering different oils. **Figure S6.** Theoretical wetting model of superhydrophilic and underwater superoleophobic or superoleophilic and underoil superhydrophobic filter media. (a) In air, water can pass through superhydrophilic quartz sand; (b) in air, oil can pass through superoleophilic quartz sand; (c) underwater, oil cannot pass through underwater superhydrophobic quartz sand; (d) under oil, water cannot pass through underoil superhydrophobic quartz sand. **Figure S7.** Adsorption Kinetic fitting. **Figure S8.** Adsorption isotherm fitting.

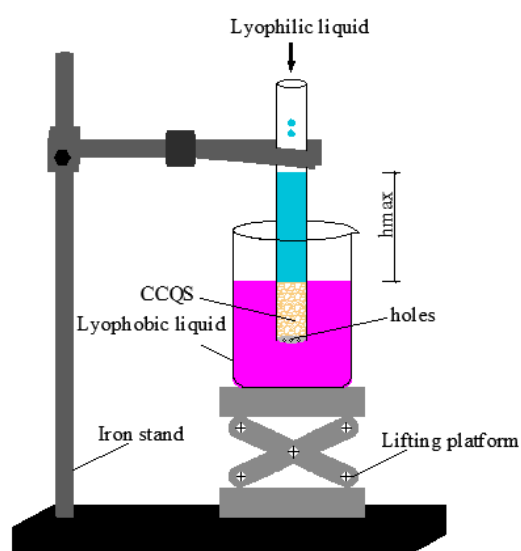

**Figure S1.** Diagram for intrusion pressure device.

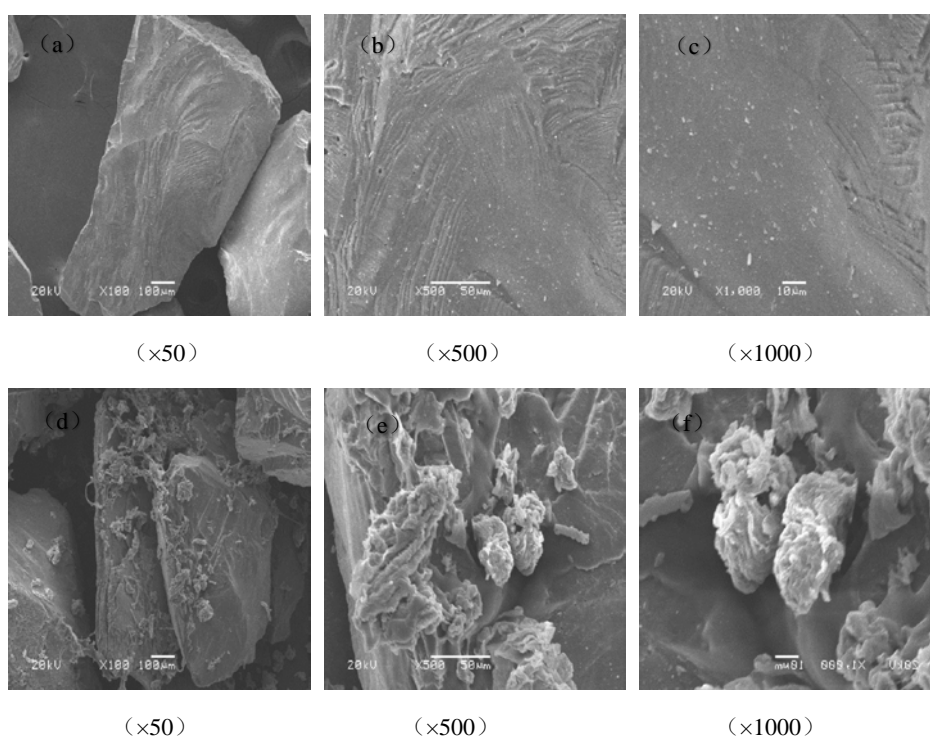

**Figure S2.** SEM images of (a-c) unmodified quartz sand; (d-f) CCQS.

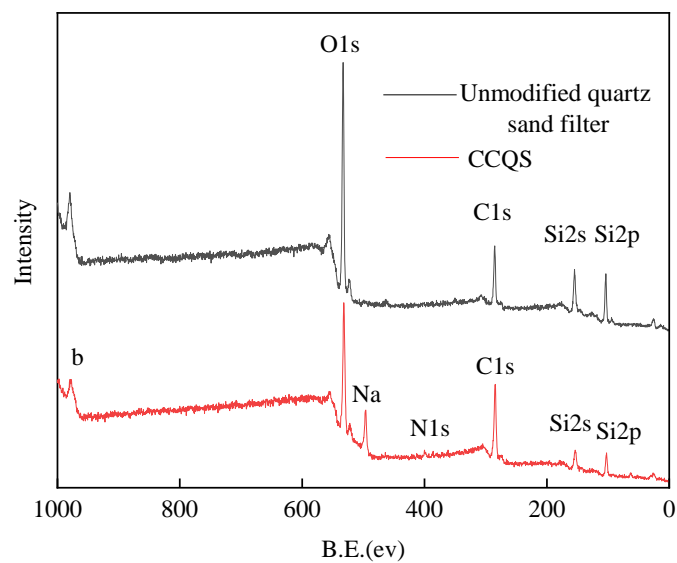

**Figure S3.** XPS spectra of Filter material.

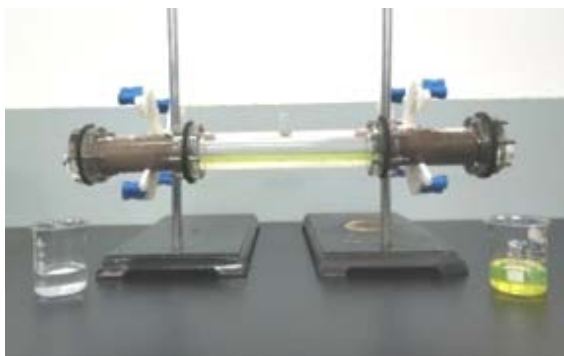

**Figure S4.** Separation device for oil and water mixture.

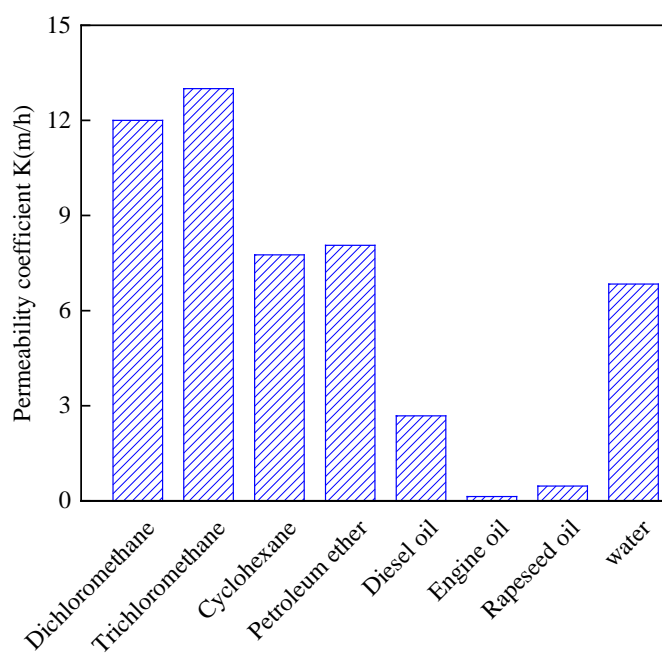

**Figure S5.** The permeability coefficients of the water outlet and oil outlet when filtering different oils.

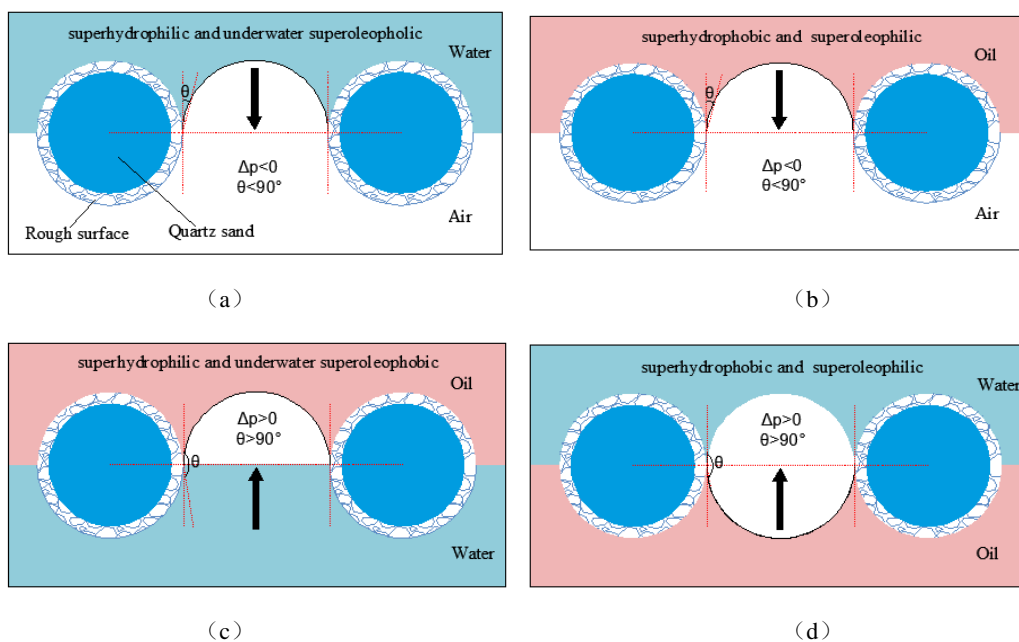

**Figure S6.** Theoretical wetting model of superhydrophilic and underwater superoleophobic or superoleophilic and underoil superhydrophobic filter media. (a) In air, water can pass through superhydrophilic quartz sand; (b) in air, oil can pass through superoleophilic quartz sand; (c) underwater, oil cannot pass through underwater superhydrophobic quartz sand; (d) under oil, water cannot pass through underoil superhydrophobic quartz sand.

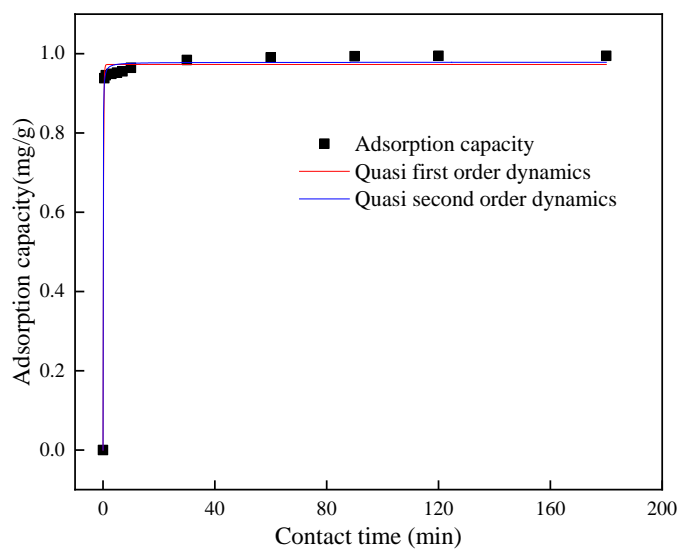

**Figure S7.** Adsorption Kinetic fitting.

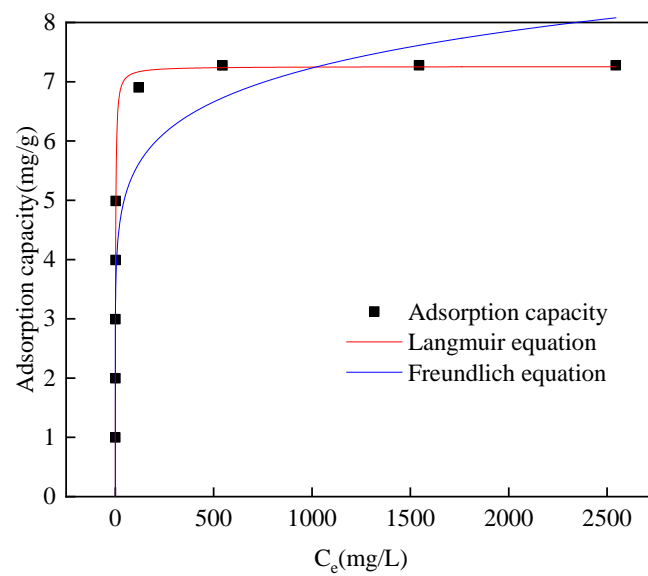

**Figure S8.** Adsorption isotherm fitting.
